# Supplementary material for: Morphology-Based Prediction of Osteogenic Differentiation Potential of Human Mesenchymal Stem Cells
Source: PLoS One. 2013 Feb 21;8(2):e55082. doi: 10.1371/journal.pone.0055082 (PMC3578868; doi:10.1371/journal.pone.0055082)
Supplement: Table S1 — * Exp. determined rate is the abbreviation of the experimentally determined rate. (XLS) [file pone.0055082.s001.xls]

## Sheet: S1
Table S1. Results of prediction of Senario I: New patient prediction scheme
A. Results of prediction of ALP activity rate
		Lot 1		Lot 2		Lot 3
		Exp. determined rate [-]*	Predicted rate [-]	Exp. determined rate [-]*	Predicted rate [-]	Exp. determined rate [-]*	Predicted rate [-]
Passage 1	Control	0.06	-0.00953545	0.04	0.263244	0.14	-0.00348508
		0.05	-0.0897873	0.03	0.218302	0.14	0.030096
		0.06	0.00857644	0.05	0.237787	0.15	0.20874
	Induction	0.68	0.772211	1.01	0.84746	1.07	0.765298
		0.8	0.858646	0.9	0.813098	0.91	0.808401
		0.64	0.865588	0.91	0.840681	0.96	0.762475
Passage 2	Control	0.07	-0.00134793	0.06	0.290578	0.13	0.425693
		0.06	-0.0764618	0.04	0.137104	0.13	0.517435
		0.08	-0.0578122	0.05	0.141224	0.16	0.24114
	Induction	0.72	0.932005	0.92	0.877876	1.13	0.893511
		0.71	0.888815	0.74	0.827928	1	0.799232
		0.8	0.923432	0.78	0.869442	1.05	0.791825
Passage 3	Control	0.05	-0.0435424	0.05	0.331375	0.12	0.267119
		0.05	-0.159166	0.04	0.400865	0.1	0.362282
		0.05	-0.0535191	0.04	0.292791	0.14	0.410699
	Induction	0.75	0.848473	0.88	0.937443	0.77	0.808798
		0.78	0.770539	0.7	0.912039	0.75	0.856132
		0.88	0.891198	0.71	0.885593	0.83	0.839867
B. Results of prediction of calcium deposition rate
		Lot 1		Lot 2		Lot 3
		Exp. determined rate [-]*	Predicted rate [-]	Exp. determined rate [-]*	Predicted rate [-]	Exp. determined rate [-]*	Predicted rate [-]
Passage 1	Control	0.31	0.270338	0.2	0.2598	0.21	0.239352
		0.31	0.237104	0.2	0.253842	0.22	0.212959
		0.3	0.24592	0.2	0.27575	0.23	0.284567
	Induction	0.46	0.317005	0.28	0.356504	0.31	0.292382
		0.47	0.334825	0.32	0.347354	0.33	0.253077
		0.49	0.355118	0.35	0.401736	0.34	0.293742
Passage 2	Control	0.31	0.238034	0.24	0.268613	0.23	0.118225
		0.31	0.247386	0.23	0.26898	0.23	0.205824
		0.33	0.256835	0.26	0.313817	0.22	0.166716
	Induction	0.44	0.326063	0.35	0.403328	0.32	0.284249
		0.45	0.322083	0.3	0.35628	0.28	0.255063
		0.44	0.341349	0.32	0.347002	0.3	0.261901
Passage 3	Control	0.28	0.222806	0.24	0.244114	0.2	0.112732
		0.27	0.213357	0.2	0.264021	0.21	0.139481
		0.3	0.232598	0.24	0.312485	0.2	0.16966
	Induction	0.37	0.3286	0.34	0.413341	0.25	0.273821
		0.41	0.30047	0.31	0.464866	0.26	0.25725
		0.43	0.298977	0.31	0.510686	0.26	0.237815
