# Supplementary material for: Morphology-Based Prediction of Osteogenic Differentiation Potential of Human Mesenchymal Stem Cells
Source: PLoS One. 2013 Feb 21;8(2):e55082. doi: 10.1371/journal.pone.0055082 (PMC3578868; doi:10.1371/journal.pone.0055082)
Supplement: Table S2 — * Exp. determined rate is the abbreviation of the experimentally determined rate. (XLSX) [file pone.0055082.s002.xlsx]

## Sheet: S2
Table S2. Results of prediction of Scenario II: Ongoing patient prediction scheme
A. Results of prediction of ALP activity rate
		Lot 1		Lot 2		Lot 3
		Exp. determined rate [-]*	Predicted rate [-]	Exp. determined rate [-]*	Predicted rate [-]	Exp. determined rate [-]*	Predicted rate [-]
Passage 2	Control	0.07	0.0697239	0.06	0.2258	0.13	0.162313
		0.06	0.00137781	0.04	0.0870942	0.13	0.246072
		0.08	0.0473921	0.05	0.135348	0.16	0.137374
	Induction	0.72	0.849224	0.92	0.896662	1.13	0.983316
		0.71	0.788794	0.74	0.852224	1	0.897212
		0.8	0.766954	0.78	0.884758	1.05	0.876011
Passage 3	Control	0.05	0.0120958	0.05	0.262325	0.12	0.224252
		0.05	-0.125016	0.04	0.334316	0.1	0.274227
		0.05	-0.0193308	0.04	0.248071	0.14	0.285449
	Induction	0.75	0.770483	0.88	0.945102	0.77	0.906267
		0.78	0.687546	0.7	0.952528	0.75	0.944349
		0.88	0.819086	0.71	0.913345	0.83	0.924306
B. Results of prediction of calcium deposition rate
		Lot 1		Lot 2		Lot 3
		Exp. determined rate [-]*	Predicted rate [-]	Exp. determined rate [-]*	Predicted rate [-]	Exp. determined rate [-]*	Predicted rate [-]
Passage 2	Control	0.31	0.281321	0.24	0.258941	0.23	0.167878
		0.31	0.271741	0.23	0.243554	0.23	0.202893
		0.33	0.308552	0.26	0.308204	0.22	0.184686
	Induction	0.44	0.406567	0.35	0.393275	0.32	0.317569
		0.45	0.397227	0.3	0.328839	0.28	0.294653
		0.44	0.43144	0.32	0.331036	0.3	0.299706
Passage 3	Control	0.28	0.273225	0.24	0.228397	0.2	0.146022
		0.27	0.259041	0.2	0.234865	0.21	0.161079
		0.3	0.269122	0.24	0.313026	0.2	0.188306
	Induction	0.37	0.422522	0.34	0.396145	0.25	0.304394
		0.41	0.346685	0.31	0.401802	0.26	0.285209
		0.43	0.359071	0.31	0.432784	0.26	0.274437
